# Supplementary material
Source: PubMed Central journal article supplement (PMC3408118)
Supplement: CJN.00550112_CJN00550112SupplementaryData.pdf [file CJN.00550112_CJN00550112SupplementaryData.pdf]

## **Quantification 25-Hydroxyvitamin D<sub>2</sub> and D<sub>3</sub> and 24R,25-dihydroxyvitamin D<sub>3</sub>**

25-hydroxyvitamin D<sub>2</sub> (25(OH)D<sub>2</sub>), 25-hydroxyvitamin D<sub>3</sub> (25(OH)D<sub>3</sub>), and 24R,25-dihydroxyvitamin D<sub>3</sub> (24R,25(OH)<sub>2</sub>D<sub>3</sub>) were measured by Ultra High Performance Liquid Chromatography (UHPLC) Tandem Mass Spectrometry. Briefly, standards were prepared by spiking known amounts of 25(OH)D<sub>2</sub>, 25(OH)D<sub>3</sub>, and 24R,25(OH)<sub>2</sub>D<sub>3</sub> (Sigma-Aldrich, St. Louis, MO) to pseudo plasma. Samples and standards (150ul for 25(OH)D<sub>2</sub> and 25(OH)D<sub>3</sub>; 200ul for 24R,25(OH)<sub>2</sub>D<sub>3</sub>) were spiked with 10 uL of a solution of internal standards (IS; hexa-deuterated 25(OH)D<sub>2</sub> and 25(OH)D<sub>3</sub>; Medical Isotopes, Pelham, MA). 25(OH)D<sub>3</sub> was used as IS for 24R,25(OH)<sub>2</sub>D<sub>3</sub>. Proteins were precipitated with the addition of 1 sample volume of 0.2M ZnSO<sub>4</sub> and 2 sample volumes of methanol. Samples and standards were subsequently extracted with either 750ul of hexane (for 25(OH)D<sub>2</sub> and 25(OH)D<sub>3</sub>) or 1000ul of 60% hexane/40% dichloromethane (for 24R,25(OH)<sub>2</sub>D<sub>3</sub>). The organic phase was evaporated and reconstituted in 50ul of 70% methanol for 24R,25(OH)<sub>2</sub>D<sub>3</sub> and 100ul of 70% methanol for 25(OH)D<sub>2</sub> and 25(OH)D<sub>3</sub> analysis.

5ul of each sample was injected onto a 2.1 x 50 mm Zorbax Eclipse Plus C18 1.8um column (Agilent, Santa Clara, CA) run isocratically at 50°C for 4.5 minutes (78% 7.5mM ammonium formate in methanol; 0.3ml/min) followed by a 2 minute rinse (95% 7.5mM ammonium formate in methanol) and a 1.5 minute re-equilibration period (total run time: 8 minutes) using a 1290 UHPLC (Agilent, Santa Clara, CA). Samples were detected by positive electrospray ionization with a 6410 triple quadrupole mass spectrometer

(Agilent, Santa Clara, CA). The source temperature was set to 250°C, gas flow 10 l/min, nebulizer pressure 45 psi, and capillary set to 4000V. 25(OH)D<sub>2</sub>, 25(OH)D<sub>3</sub>, and 24R,25(OH)<sub>2</sub>D<sub>3</sub> and the IS were optimized with a fragmentor voltage of 96V. 25(OH)D<sub>2</sub>, 25(OH)D<sub>3</sub>, 24R,25(OH)<sub>2</sub>D<sub>3</sub>, and IS were quantified using multiple reaction monitoring of the H<sup>+</sup> ion with the transition 413.3 to 395.3 (collision energy = 2V), 401.3 to 383.4 (collision energy = 3V), 417.6 to 121.2 (collision energy = 13V) and 407.3 to 389.3 (collision energy = 2V), respectively. Quantification of analytes was calculated using the spiked pseudo plasma standard curves (response of analyte/response of IS). The method is linear from 1.3ng/ml to 100 ng/ml, 0.7ng/ml to 100ng/ml and 0.5ng/ml to 100ng/ml, and inter-assay precision is 3.4%, 4.8% and <10% for 25(OH)D<sub>2</sub>, 25(OH)D<sub>3</sub>, and 24R,25(OH)<sub>2</sub>D<sub>3</sub>, respectively.
